# Supplementary material
Source: publisher figshare collection journal article supplement (https://sage.figshare.com/ndownloader/files/14993849)
Supplement: Supplementary file 1 [file 14993849]

Supplemental Material

Table 4: Demographic Breakdown of CMPS Respondents

unweighted frequencies

N %

| First Generation | 871 | 29% |
| --- | --- | --- |
| Second Generation | 1206 | 40% |
| Third Generation | 345 | 12% |
| Fourth Generation | 580 | 19% |
| Mexican | 1,498 | 50% |
| Puerto Rican | 491 | 16% |
| Cuban | 160 | 5% |
| Dominican | 107 | 4% |
| South American | 266 | 9% |
| Central American | 181 | 6% |
| Other | 300 | 10% |
| California | 763 | 25% |
| Arizona | 97 | 3% |
| Texas | 537 | 18% |
| Florida | 365 | 12% |
| New York/ New Jersey | 366 | 12% |
| Other States | 875 | 29% |
| Grade 1-8 | 49 | 2% |
| Some High School | 216 | 7% |
| H.S. Grad or GED | 751 | 25% |
| Some College | 1041 | 34% |
| College Graduate | 628 | 21% |
| Post Graduate Education | 318 | 11% |

Table 5: displays the results from 5 diﬀerent versions of the participation scale in which we iteratively removed one item from the scale to make sure no one variable was driving

| our results. The column name  participation scale. | indicates which | of the five items | was excluded from the |
| --- | --- | --- | --- |
|  | protest govt contact | civic group gave money | campaign work |
| Angry | 0.393∗∗∗ 0.384∗∗∗  (0.056) (0.062) | 0.492∗∗∗ 0.415∗∗∗  (0.062) (0.056) | 0.467∗∗∗ (0.054) |
| Racism Most Important Issue | −0.037 0.055 | −0.064 0.033 | −0.065  (0.070) |
| Second generation | 0.319∗∗∗ 0.401∗∗∗  (0.069) (0.076) | 0.304∗∗∗ 0.252∗∗∗  (0.074) (0.069) | 0.255∗∗∗  (0.066) |
| Third generation | 0.486∗∗∗ 0.624∗∗∗  (0.097) (0.106) | 0.501∗∗∗ 0.516∗∗∗  (0.103) (0.096) | 0.499∗∗∗  (0.091) |
| Fourth generation | 0.351∗∗∗ 0.440∗∗∗  (0.096) (0.108) | 0.246∗ 0.241∗  (0.107) (0.098) | 0.259∗∗  (0.093) |
| Uses Spanish Language | 0.097∗∗∗ 0.189∗∗∗  (0.027) (0.028) | 0.087∗∗ 0.142∗∗∗  (0.029) (0.025) | 0.124∗∗∗  (0.025) |
| Democrat | 0.028 0.098  (0.084) (0.094) | 0.170 0.032  (0.096) (0.084) | 0.027  (0.081) |
| Independent | −0.231∗∗ −0.336∗∗∗ | −0.168 −0.282∗∗ | −0.259∗∗  (0.086) |
| Ideology | −0.164∗∗∗ −0.213∗∗∗ | −0.206∗∗∗ −0.189∗∗∗ | −0.209∗∗∗  (0.027) |
| Int. Eﬃcacy | 0.050∗ 0.042  (0.023) (0.025) | 0.025 0.030  (0.025) (0.023) | 0.058∗∗  (0.022) |
| Economy Worse | −0.069∗∗ −0.066∗∗ | −0.043 −0.054∗ | −0.051∗  (0.021) |
| Cuban | 0.117 0.161  (0.139) (0.160) | 0.230 0.196  (0.150) (0.140) | 0.138  (0.135) |
| Puerto Rican | 0.165 0.108  (0.095) (0.109) | 0.178 0.176  (0.105) (0.097) | 0.162  (0.092) |
| Dominican | −0.067 −0.069 | −0.029 −0.062 | −0.135  (0.164) |
| Central American | −0.193 −0.076 | −0.151 −0.086 | −0.156  (0.099) |
| South American | 0.270∗ 0.277∗  (0.108) (0.121) | 0.241∗ 0.309∗∗  (0.120) (0.108) | 0.232∗  (0.105) |
| Spanish Other | 0.005 −0.016 | 0.033 −0.006 | −0.020  (0.122) |
| Arizona | −0.272 −0.238 | −0.041 −0.333∗ | −0.271  (0.154) |
| Texas | −0.331∗∗∗ −0.441∗∗∗ | −0.393∗∗∗ −0.373∗∗∗ | −0.357∗∗∗  (0.079) |
| Florida | −0.070 −0.304∗ | −0.200 −0.119 | −0.124  (0.101) |
| New Jersey & New York | −0.140 −0.346∗∗ | −0.337∗∗ −0.296∗∗ | −0.274∗∗  (0.101) |
| All other states | −0.083 −0.216∗∗ | −0.156∗ −0.115 | −0.092  (0.067) |
| Evangelical | 0.232∗∗∗ 0.190∗  (0.067) (0.074) | 0.120 0.152∗  (0.076) (0.068) | 0.199∗∗  (0.065) |
| Education | 0.242∗∗∗ 0.181∗∗∗  (0.024) (0.026) | 0.241∗∗∗ 0.193∗∗∗  (0.026) (0.024) | 0.192∗∗∗  (0.023) |
| Income | 0.041∗∗∗ 0.054∗∗∗  (0.009) (0.010) | 0.048∗∗∗ 0.029∗∗  (0.010) (0.009) | 0.045∗∗∗  (0.009) |
| Age | 0.005∗∗ 0.002  (0.002) (0.002) | 0.004 0.002  (0.002) (0.002) | 0.003  (0.002) |
| Female | −0.334∗∗∗ −0.260∗∗∗ | −0.270∗∗∗ −0.266∗∗∗ | −0.280∗∗∗  (0.053) |
| Constant | −1.829∗∗∗ −1.786∗∗∗ | −1.928∗∗∗ −1.418∗∗∗ | −1.463∗∗∗  (0.185) |
| Observations Log Likelihood Akaike Inf. Crit. | 2,997 2,997  −2,661.859 −2,407.682 | 2,997 2,997  −2,407.506 −2,721.903 | 2,997  −2,833.742  5,723.484 |

(0.074) (0.077) (0.080) (0.071)

(0.088) (0.101) (0.101) (0.089)

(0.028) (0.031) (0.031) (0.028)

(0.022) (0.024) (0.024) (0.022)

(0.165) (0.185) (0.183) (0.166)

(0.106) (0.110) (0.113) (0.100)

(0.124) (0.144) (0.136) (0.131)

(0.164) (0.166) (0.155) (0.164)

(0.084) (0.090) (0.091) (0.082)

(0.104) (0.121) (0.116) (0.105)

(0.104) (0.116) (0.116) (0.105)

(0.071) (0.077) (0.077) (0.071)

(0.056) (0.061) (0.060) (0.055)

(0.195) (0.213) (0.213) (0.191)

5,379.718 4,871.364 4,871.013 5,499.806

*Note:* ∗p<0.05; ∗∗p<0.01; ∗∗∗p<0.001

Table 6: This table displays the results for Trump favorability looking only at Democratic respondents

trump fav Immigrant Linked Fate 0.157∗∗

(0.052)

−

Racism scale 0.971∗∗∗

−

(0.167)

Racism Most Important Issue 0.889∗∗∗ (0.220)

−

Second generation 0.621∗∗∗

−

(0.180)

Third generation 0.246

(0.287)

Fourth generation + 0.375

−

(0.260)

Uses Spanish Language 0.175∗∗ (0.067)

−

Ideology 0.171∗

(0.075)

Int. Eﬃcacy 0.008

−

(0.063)

Economy Worse 0.293∗∗∗

−

(0.062)

Cuban 0.450

−

(0.537)

Puerto Rican 0.277

(0.266)

Dominican 0.792∗

(0.368)

Central American 0.384

(0.230)

South American 0.369

(0.327)

Spanish Other 0.217

−

(0.392)

Arizona 0.276

−

(0.389)

Texas 0.379∗

(0.188)

Florida 0.738∗∗

(0.280)

New Jersey & New York 0.088

−

(0.260)

All other states 0.400∗

−

(0.204)

Evangelical 0.348∗

(0.170)

Education 0.277∗∗∗

−

(0.068)

Income 0.024

(0.027)

Age 0.025∗∗∗

−

(0.005)

Female 0.696∗∗∗

−

(0.144)

Observations 1,455

*Note:* ∗p<0.05; ∗∗p<0.01; ∗∗∗p<0.001

Table 7

Trump Favorability

Immigrant Linked Fate 0.169∗∗∗ 0.167∗∗∗ 0.171∗∗∗ (0.033) (0.033) (0.033)

− − −

Racism Scale 0.936∗∗∗ 0.919∗∗∗ 0.717∗∗∗ (0.123) (0.167) (0.140)

− − −

Racism Most Important Issue 0.701∗∗∗ 0.707∗∗∗ 0.712∗∗∗

− − −

(0.135) (0.135) (0.135)

Second Generation 0.275∗ 0.288∗ 0.105

− − −

(0.114) (0.114) (0.279)

Third Generation 0.361∗ 0.343∗ 0.430

(0.159) (0.159) (0.394)

Fourth Generation + 0.223 0.240 0.405

− −

(0.152) (0.152) (0.340)

Uses Spanish Language 0.083∗ 0.095∗ 0.095∗ (0.042) (0.042) (0.042)

− − −

Democrat 1.835∗∗∗ 1.852∗∗∗ 1.850∗∗∗ (0.126) (0.127) (0.126)

− − −

Independent 1.351∗∗∗ 1.365∗∗∗ 1.352∗∗∗ (0.123) (0.124) (0.123)

− − −

Ideology 0.244∗∗∗ 0.249∗∗∗ 0.243∗∗∗ (0.045) (0.045) (0.045)

Internal Eﬃcacy 0.018 0.016 0.015

(0.038) (0.038) (0.038)

Economy Worse 0.184∗∗∗ 0.187∗∗∗ 0.183∗∗∗ (0.038) (0.038) (0.038)

− − −

Cuban 0.828 0.667∗∗ 0.653∗∗

(0.424) (0.224) (0.224)

Puerto Rican 0.405 0.133 0.139

− − −

(0.420) (0.166) (0.165)

Dominican 0.955 0.046 0.018

− − −

(0.714) (0.255) (0.255)

Central American 0.418 0.340∗ 0.349∗ (0.428) (0.153) (0.153)

South American 0.829 0.218 0.234

−

(0.436) (0.193) (0.193)

Spanish Other 0.396 0.116 0.130

(0.470) (0.202) (0.203)

Arizona 0.241 0.192 0.267

− − −

(0.253) (0.722) (0.252)

Texas 0.047 0.093 0.053

−

(0.123) (0.337) (0.123)

Florida 0.267 0.314 0.266

−

(0.174) (0.405) (0.175)

New Jersey & New York 0.125 0.186 0.103

−

(0.175) (0.433) (0.174)

All other States 0.050 0.203 0.042

(0.118) (0.304) (0.118)

Evangelical 0.613∗∗∗ 0.593∗∗∗ 0.595∗∗∗ (0.106) (0.106) (0.106)

Education 0.064 0.059 0.062

− − −

(0.040) (0.041) (0.040)

Income 0.020 0.023 0.019

− − −

(0.017) (0.017) (0.017)

Age 0.015∗∗∗ 0.015∗∗∗ 0.015∗∗∗

− − −

(0.003) (0.003) (0.003)

Female 0.398∗∗∗ 0.399∗∗∗ 0.407∗∗∗ (0.089) (0.089) (0.089)

− − −

Racism Scale * Cuban 0.242

−

(0.364)

Racism Scale * Puerto Rican 0.218

(0.321)

Racism Scale * Dominican 0.751

(0.535)

Racism Scale * Central American 0.072

−

(0.332)

Racism Scale * South American 0.905∗∗ (0.332)

Racism Scale * Other Ethnic 0.242

−

(0.389)

Racism Scale * Arizona 0.045

−

(0.512)

Racism Scale * Texas 0.112

(0.254)

Racism Scale * Florida 0.473

(0.295)

Racism Scale * New York & New Jersey 0.243

(0.320)

Racism Scale * All Other States 0.139

−

(0.234)

Racism Scale * Second Generation 0.150

−

(0.209)

Racism Scale * Third Generation 0.059

−

(0.304)

Racism Scale * Fourth Generation+ 0.571∗ (0.276)

−

Observations 2,834 2,834 2,834 39

*Note:* ∗p<0.05; ∗∗p<0.01; ∗∗∗p<0.001

Table 8

Trump Favorability

Immigrant Linked Fate 0.161∗∗∗ 0.162∗∗∗ 0.163∗∗∗ (0.032) (0.032) (0.032)

− − −

Racism Scale 0.801∗∗∗ 0.858∗∗∗ 0.953∗∗∗ (0.141) (0.110) (0.124)

− − −

Racism Most Important Issue 0.703∗∗∗ 0.706∗∗∗ 0.699∗∗∗

− − −

(0.133) (0.133) (0.133)

First Generation 0.242∗ 0.243∗ 0.050

(0.101) (0.101) (0.236)

Uses Spanish Language 0.097∗ 0.099∗ 0.100∗ (0.040) (0.040) (0.040)

− − −

Democrat 1.922∗∗∗ 1.916∗∗∗ 1.923∗∗∗ (0.125) (0.124) (0.125)

− − −

Independent 1.381∗∗∗ 1.378∗∗∗ 1.382∗∗∗ (0.122) (0.122) (0.122)

− − −

Ideology 0.243∗∗∗ 0.242∗∗∗ 0.240∗∗∗ (0.045) (0.045) (0.045)

Internal Eﬃcacy 0.014 0.015 0.015

(0.038) (0.038) (0.038)

Economy Worse 0.198∗∗∗ 0.198∗∗∗ 0.197∗∗∗ (0.038) (0.038) (0.038)

− − −

Mexican 0.017 0.181 0.183

− − −

(0.230) (0.094) (0.094)

Californian 0.027 0.080 0.029

− −

(0.097) (0.252) (0.097)

Evangelical 0.573∗∗∗ 0.575∗∗∗ 0.576∗∗∗ (0.104) (0.104) (0.104)

Education 0.044 0.043 0.042

− − −

(0.040) (0.040) (0.040)

Income 0.020 0.020 0.020

− − −

(0.017) (0.017) (0.017)

Age 0.014∗∗∗ 0.014∗∗∗ 0.014∗∗∗ (0.003) (0.003) (0.003)

− − −

Female 0.392∗∗∗ 0.392∗∗∗ 0.396∗∗∗ (0.087) (0.087) (0.087)

− − −

Racism Scale * Mexican 0.138

−

(0.178)

Racism Scale * Californian 0.087

−

(0.189)

Racism Scale * First Generation 0.159

(0.177)

Observations 2,834 2,834 2,834

*Note:* ∗p<0.05; ∗∗p<0.01; ∗∗∗p<0.001

40

Table 9

|  | (0.065) | (0.085) | (0.080) |
| --- | --- | --- | --- |
| Racism Most Important Issue | −0.025 | −0.005 | −0.019  (0.066) |
| Second Generation | 0.294∗∗∗  (0.063) | 0.295∗∗∗  (0.063) | 0.304∗∗  (0.093) |
| Third Generation | 0.516∗∗∗  (0.088) | 0.521∗∗∗  (0.088) | 0.445∗∗  (0.141) |
| Fourth Generation + | 0.297∗∗∗  (0.089) | 0.292∗∗  (0.089) | 0.336∗∗  (0.130) |
| Uses Spanish Language | 0.130∗∗∗  (0.024) | 0.127∗∗∗  (0.024) | 0.129∗∗∗  (0.024) |
| Democrat | 0.070  (0.078) | 0.065  (0.078) | 0.063  (0.078) |
| Independent | −0.258∗∗ | −0.257∗∗ | −0.256∗∗  (0.083) |
| Ideology | −0.194∗∗∗ | −0.200∗∗∗ | −0.195∗∗∗  (0.026) |
| Internal Eﬃcacy | 0.039  (0.021) | 0.044∗  (0.021) | 0.042∗  (0.021) |
| Economy Worse | −0.060∗∗ | −0.061∗∗ | −0.056∗∗  (0.020) |
| Cuban | −0.069 | 0.165  (0.129) | 0.164  (0.129) |
| Puerto Rican | 0.248∗  (0.123) | 0.157  (0.088) | 0.156  (0.089) |
| Dominican | −0.764∗∗ | −0.071 | −0.078  (0.154) |
| Central American | −0.227 | −0.141 | −0.136  (0.094) |
| South American | 0.335∗  (0.134) | 0.276∗∗  (0.100) | 0.263∗∗  (0.100) |
| Spanish Other | −0.026 | −0.019 | −0.002  (0.117) |
| Arizona | −0.232 | 0.056  (0.213) | −0.236  (0.143) |
| Texas | −0.378∗∗∗ | −0.426∗∗∗ | −0.379∗∗∗  (0.076) |
| Florida | −0.163 | −0.439∗∗ | −0.155  (0.097) |
| New Jersey & New York | −0.248∗ | −0.380∗∗ | −0.275∗∗  (0.097) |
| All other States | −0.131∗ | −0.261∗∗ | −0.126  (0.065) |
| Evangelical | 0.174∗∗  (0.062) | 0.186∗∗  (0.062) | 0.180∗∗  (0.062) |
| Education | 0.209∗∗∗  (0.022) | 0.212∗∗∗  (0.022) | 0.209∗∗∗  (0.022) |
| Income | 0.046∗∗∗  (0.009) | 0.042∗∗∗  (0.009) | 0.043∗∗∗  (0.009) |
| Age | 0.003  (0.002) | 0.004∗  (0.002) | 0.003  (0.002) |
| Female | −0.274∗∗∗ | −0.280∗∗∗ | −0.283∗∗∗  (0.051) |
| Angry * Cuban | 0.404  (0.238) |  |  |
| Angry * Puerto Rican | −0.182 |  |  |
| Angry * Dominican | 1.174∗∗∗  (0.311) |  |  |
| Angry * Central American | 0.155  (0.185) |  |  |
| Angry * South American | −0.167 |  |  |
| Angry * Other Ethnic | 0.036  (0.237) |  |  |
| Angry * Arizona |  | −0.473 |  |
| Angry * Texas |  | 0.079  (0.153) |  |
| Angry * Florida |  | 0.510∗∗  (0.171) |  |
| Angry * New York/ New Jersey |  | 0.170  (0.173) |  |
| Angry * All Other States |  | 0.214  (0.126) |  |
| Angry * Second Generation |  |  | −0.003  (0.114) |
| Angry * Third Generation |  |  | 0.114  (0.166) |
| Angry * Fourth Generation+ |  |  | −0.053  (0.158) |
| Constant | −1.431∗∗∗ | −1.377∗∗∗ | −1.448∗∗∗  (0.181) |
| Observations Log Likelihood  Akaike Inf. Crit. | 2,997  −3,016.708 | 2,997  6 −3,020.742  6,107.484 | 2,997  −3,027.637  6,117.275 |

*Political Participation*

Feeling Angry 0.396∗∗∗ 0.300∗∗∗ 0.426∗∗∗ (0.067) (0.066)

(0.083) (0.083)

(0.026) (0.026)

(0.020) (0.020)

(0.196)

(0.267) (0.155)

(0.144) (0.094)

(0.196) (0.117)

(0.143)

(0.076) (0.120)

(0.097) (0.139)

(0.096) (0.139)

(0.065) (0.101)

(0.051) (0.051)

(0.158)

(0.179)

(0.287)

(0.179) (0.182)

41

6,101.41

*Note:* ∗p<0.05; ∗∗p<0.01; ∗∗∗p<0.001

Table 10: path analysis

| lhs | op | rhs | label | est | se | z | pvalue | std.lv | std.all | std.nox |
| --- | --- | --- | --- | --- | --- | --- | --- | --- | --- | --- |
| Anger | ˜1 |  |  | 1.44 | 0.06 | 23.87 | 0.00 | 1.44 | 1.46 | 1.46 |
| Anger | ˜ | Reverse Trump Favorability | t | 0.33 | 0.02 | 18.83 | 0.00 | 0.33 | 0.34 | 0.33 |
| Political Part. | ˜1 |  |  | -0.71 | 0.17 | -4.22 | 0.00 | -0.71 | -0.60 | -0.60 |
| Political Part. | ˜ | Anger | a | 0.17 | 0.02 | 7.75 | 0.00 | 0.17 | 0.14 | 0.14 |
| Political Part. | ˜ | Racism scale | b | -0.02 | 0.04 | -0.44 | 0.66 | -0.02 | -0.01 | -0.01 |
| Political Part. | ˜ | Immigrant Linked Fate | c | 0.17 | 0.02 | 10.30 | 0.00 | 0.17 | 0.20 | 0.14 |
| Political Part. | ˜ | First Generation | d | -0.35 | 0.05 | -7.23 | 0.00 | -0.35 | -0.14 | -0.30 |
| Political Part. | ˜ | Use of Spanish | e | 0.09 | 0.02 | 3.89 | 0.00 | 0.09 | 0.08 | 0.07 |
| Political Part. | ˜ | Ideology | f | 0.00 | 0.02 | 0.12 | 0.91 | 0.00 | 0.00 | 0.00 |
| Political Part. | ˜ | Internal Eﬃcacy | f | 0.00 | 0.02 | 0.12 | 0.91 | 0.00 | 0.00 | 0.00 |
| Political Part. | ˜ | Mexican Origin | h | -0.09 | 0.04 | -1.99 | 0.05 | -0.09 | -0.04 | -0.08 |
| Political Part. | ˜ | Californian | i | 0.10 | 0.05 | 1.91 | 0.06 | 0.10 | 0.04 | 0.08 |
| Political Part. | ˜ | Education | j | 0.20 | 0.02 | 10.54 | 0.00 | 0.20 | 0.19 | 0.17 |
| Political Part. | ˜ | Age | k | 0.01 | 0.00 | 3.49 | 0.00 | 0.01 | 0.06 | 0.00 |
| Political Part. | ˜ | Female | l | -0.27 | 0.05 | -5.83 | 0.00 | -0.27 | -0.11 | -0.23 |
| Political Part. | ˜ | Reverse Trump Favorability | tf | -0.03 | 0.02 | -1.39 | 0.16 | -0.03 | -0.03 | -0.03 |
| Anger | ˜˜ | Anger |  | 0.86 | 0.02 | 48.91 | 0.00 | 0.86 | 0.89 | 0.89 |
| Political Part. | ˜˜ | Political Part. |  | 1.21 | 0.04 | 27.57 | 0.00 | 1.21 | 0.87 | 0.87 |
| at (indirect) | := | a*t | at | 0.06 | 0.01 | 7.14 | 0.00 | 0.06 | 0.05 | 0.05 |
| Total | := | at+tf | Total | 0.02 | 0.02 | 1.11 | 0.27 | 0.02 | 0.02 | 0.02 |

We conducted path analysis to examine the mediating eﬀect of anger on high cost participation. We relied on the lavaan package in R to run this analysis. In our model, we specified anger as the mediating variable between reverse coded Trump favorability and high cost participation. The first path predicted anger as a function of Trump unfavorability. The second path predicted participation as a function of all key covariates including immigrant linked fate and the racism scale. The third path, specifies the direct relationship between Trump unfavorability and high cost participation. We find that a one unit change in dis- liking Trump is significantly associated with a .33 change in anger. Adjusting for Trump (un)favorability, a one unit increase in anger is significantly associated with a .17 change in high cost participation. For every .33 increase in the association between Trump unfavorability and anger, there was a .06 increase in high cost participation. We found no evidence that anger was associated with high participation variable. The results from the two stage least squares is similar to that of our path analysis model.

Table 11: Two stage least squares

Political Participation

Reverse Trump Favorability 0.647∗∗∗ (0.124)

Racism Scale 0.347∗∗∗

−

(0.092)

Immigrant Linked Fate 0.144∗∗∗ (0.019)

First Generation 0.370∗∗∗

−

(0.058)

Use of Spanish Language 0.104∗∗∗ (0.025)

Ideology 0.054

(0.040)

Internal Eﬃcacy 0.081∗∗∗

(0.021)

Mexican Origin 0.109∗

−

(0.051)

Californian 0.079

(0.057)

Education 0.194∗∗∗

(0.021)

Age 0.006∗∗

(0.002)

Female 0.312∗∗∗

−

(0.053)

Constant 2.411∗∗∗

−

(0.419)

Observations 2,912

R2 0.121

−

Adjusted R2 0.125

−

Residual Std. Error 1.260 (df = 2899)

*Note:* ∗p<0.05; ∗∗p<0.01; ∗∗∗p<0.001
